# Supplementary material for: Incidence of out-of-hospital cardiac arrests and survival rates after 1 month among the Japanese working population: a cohort study
Source: HighWire-hosted journal article supplement (doi:10.1136/bmjopen-2020-047932), 2021-12-01

Supplementary Figure. 1

**Percentage of CPR for cardiogenic OHCA  
in the working population for each year  
among the citizen bystanders**

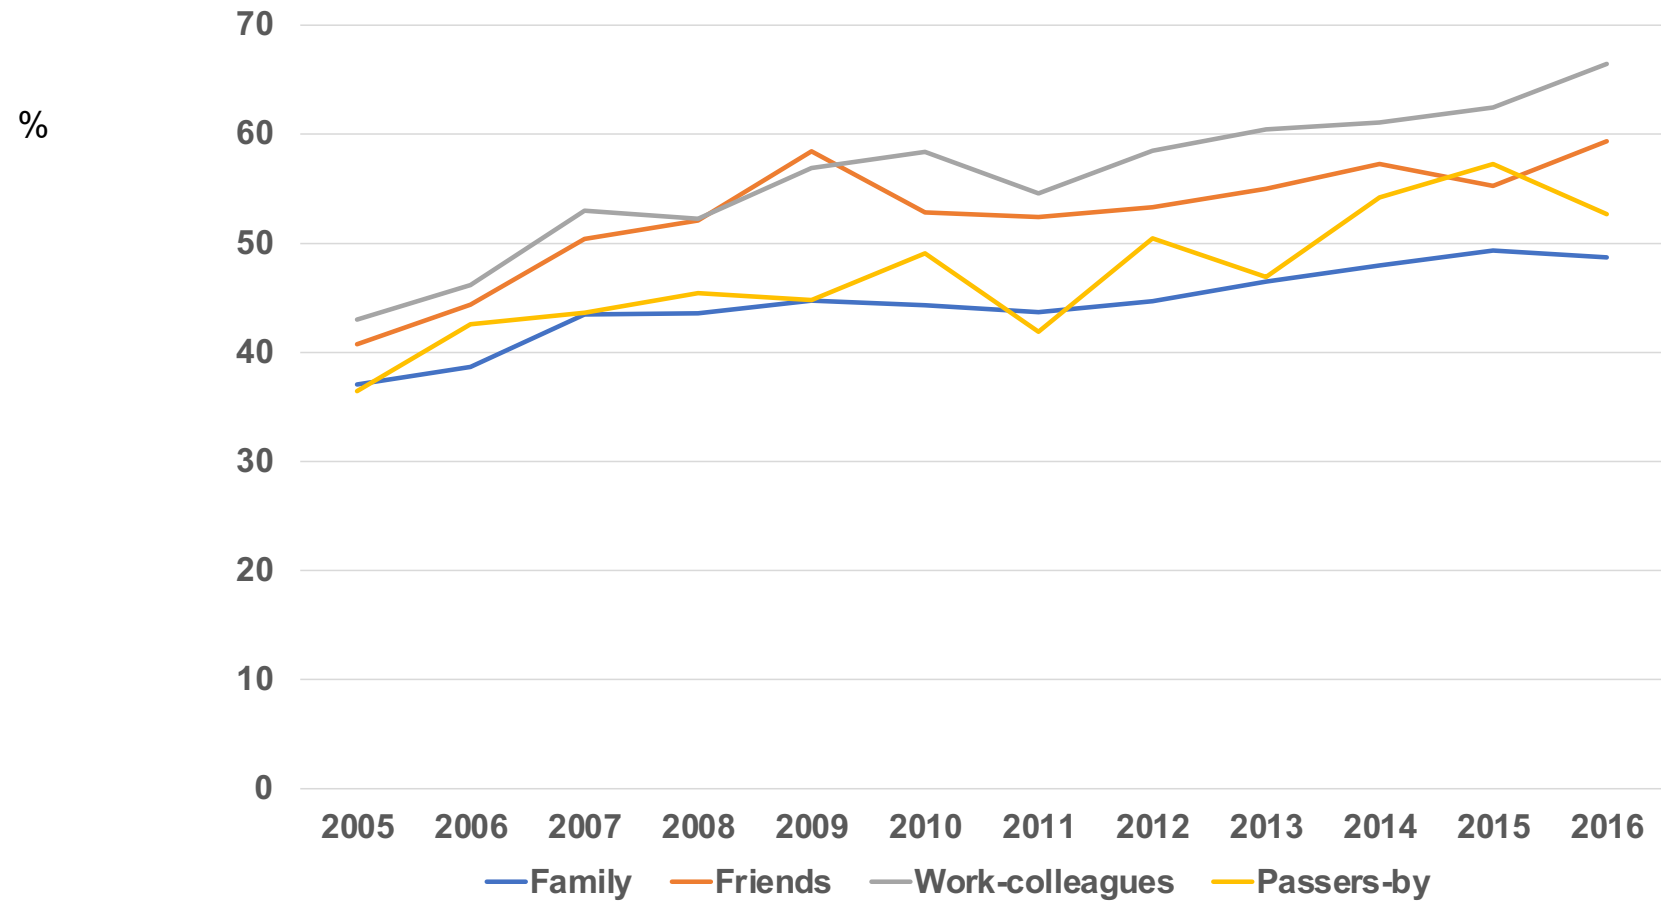

Supplement: bmjopen-2020-047932supp001_data_supplement.pdf [file bmjopen-2020-047932supp001_data_supplement.pdf]
