# Supplementary material for: Incidence of out-of-hospital cardiac arrests and survival rates after 1 month among the Japanese working population: a cohort study
Source: HighWire-hosted journal article supplement (doi:10.1136/bmjopen-2020-047932), 2021-12-01
Supplement: bmjopen-2020-047932supp002_data_supplement.pdf [file bmjopen-2020-047932supp002_data_supplement.pdf]

**Supplementary Table 1.** Information about the abnormal value of time course

|                                           | Time course, minutes |               |           |
|-------------------------------------------|----------------------|---------------|-----------|
|                                           | < 0                  | 0 - 60        | 60 <      |
| Witness call, n (%)                       | 13,784 (20.7)        | 52,281 (78.6) | 472 (0.7) |
| Call to contact, n (%)                    | 20 (0.0)             | 66,440 (99.9) | 83 (0.1)  |
| Witness-initiated CPR by bystander, n (%) | 40 (0.1)             | 30,264 (99.4) | 152 (0.5) |
| Witness-initial defibrillation, n (%)     | 112 (0.4)            | 31,190 (98.8) | 253 (0.8) |

Abbreviations: CPR, cardiopulmonary resuscitation.
